# Supplementary material for: A Spaced-Repetition Approach to Enhance Medical Student Learning and Engagement in Pharmacology
Source: Research Square preprint supplement (doi:10.21203/rs.3.rs-625499/v1), 2021-07-12
Supplement: Supplementary file 1 [file 77d2af42f495b86ff5954773.docx]

A Spaced-Repetition Approach to Enhance Medical Student Learning and Engagement in Pharmacology

**Appendix 1: Pharmacology Test**

Please complete the following quiz without utilising textbooks or resources. We are interested in what knowledge in pharmacology you have retained.

**Please Note:** This quiz is not a part of your course assessment and has no impact on your course progress.

Please complete the following quiz without utilising textbooks or resources. We are interested in what knowledge in pharmacology you have retained.

Theme: Pharmacokinetics

1. Which of the following would be expected to increase drug half-life? (Assume first-order kinetics)

1. **Increasing volume of distribution**
2. Decreasing volume of distribution
3. Increased drug clearance
4. Decreasing drug dosage
5. Increasing drug dosage

**Post Answer Feedback**: Half life ∝ Volume of distribution / Clearance. Hence, increasing volume of distribution increases half life. Conceptually, increasing the volume of distribution increases the amount of drug sequestered within the tissues, where it is protected from hepatic metabolism or renal excretion.
Options D and E: Drug dosage does not affect drug half-life.
Options B and C: Decrease drug half-life

2. 200mg of Drug X is administered in a single intravenous dose to a 75kg man. The drug’s volume of distribution is 4L, it’s half-life is 5 hours and its pKa is 7. After 20 hours, what amount of drug X would you expect to still be present?

1. 100 mg
2. 50 mg
3. 25 mg
4. **12.5 mg**
5. 6.25 mg

**Post Answer Feedback**:

200 mg * (0.5)4 = 200 mg * 0.0625 = 12.5 mg

| Half life | Plasma concentration (%) | Amount (mg) |
| --- | --- | --- |
| 1st | 50% | 100 |
| 2nd | 25% | 50 |
| 3rd | 12.5% | 25 |
| 4th | 6.25% | 12.5 |
| 5th | 3.125% | 6.25 |

Theme: Antimicrobials (adverse effects)

3. Which of the following antimicrobials are associated with developmental deformities in bones and teeth, especially within children?

1. Penicillin
2. Aminoglycoside
3. Nitroimidazole
4. Macrolide
5. **Tetracycline**

**Post Answer Feedback**: Tetracyclines strongly binds to divalent and trivalent cations, such as Ca2+, within the gastrointestinal tract, which prevents absorption. This can lead to developmental deformities in bones and teeth, especially within young children and foetuses within pregnant women.

Therefore tetracyclines are contraindicated in children <8 years due to tooth discoloration, enamel dysplasia and bone deformities. Note that some tetracyclines (e.g. doxycycline) are less strongly associated with this ADR. Thus, doxycycline may be used for serious infections, eg Q fever, when other agents are unsuitable (small studies suggest that a short course of doxycycline may not stain teeth). Source [AMH 2019](https://amhonline-amh-net-au.ezproxy.lib.monash.edu.au/chapters/anti-infectives/antibacterials/tetracyclines/tetracycline)

Theme: Cardiology (drug interactions)

4. Patients with hypertension commonly require more than one class of anti-hypertensive medication to achieve adequate blood pressure control. Which of the following combinations of blood pressure medications should be **avoided?**

1. **Non-dihydropyridine calcium channel blocker and beta-1 selective antagonist**
2. Alpha-2 agonist and an angiotensin receptor 2 blocker
3. Dihydropyridine calcium channel blocker and an angiotensin-converting enzyme inhibitor
4. Angiotensin receptor 2 blocker and a thiazide diuretic
5. Alpha-1 antagonist and an angiotensin-converting enzyme inhibitor

**Post Answer Feedback:** Non-dihydropyridine calcium channel blockers (e.g. verapamil and diltiazem) largely act through reducing cardiomyocyte contractility, as a negative inotrope. Beta-1 selective antagonists (e.g. atenolol or metoprolol) inhibit catecholamine action upon cardiomyocytes, which (amongst other effects) reduces cardiomyocyte contractility. Thus, coadministration of both of these drug groups together should be avoided due to the risk of heart failure resulting from synergistic reduction of cardiac contractility.

Theme: Respiratory (mechanism of action)

5. Which of the following is an example of an inhaled asthma “preventer” medication that works by suppressing airway inflammation and airway remodelling?

1. Short acting beta-2 agonist
2. Long-acting beta-2 agonist
3. **Corticosteroid**
4. Leukotriene receptor antagonist
5. Anticholinergic

**Post Answer Feedback**: Corticosteroids modulate gene expression, inducing annexin-1 expression upon the surface of cells. Annexin-1 has a variety of anti-inflammatory effects, including inhibition of phospholipase A2 (Suppressing eicosanoid biosynthesis) and inhibition of leukocyte activity. In asthma, the suppression of airway inflammation prevents remodelling processes such as fibrosis and smooth muscle hyperplasia.

Theme: Gastrointestinal (indications)

6. Which of the following drug classes is indicated for the treatment of gastric ulcers?

1. Na1+/Cl1- symporter inhibitors
2. Muscarinic agonist drugs
3. H1 receptor antagonists
4. **H2 receptor antagonists**
5. Antacids

**Post Answer Feedback**: Na1+/Cl1- symporter inhibitors are diuretics (e.g. thiazides and thiazide like diuretics) and would not treat peptic ulcers . Muscarinic agonists would increase gastric acid secretion, exacerbating peptic ulcers. H1 receptor antagonists are antihistamines utilised in the treatment of conditions such as allergic rhinitis and urticaria. Antacids may be effective in providing some relief from duodenal ulcers, but are largely ineffective against gastric ulcers.

H2 receptor antagonists inhibit the gastric H2 receptor, reducing acid secretion (Especially nocturnal acid secretion).

Theme: Endocrinology (clinical application)

7. Jane is a 63 year old female who presents to the GP clinic for review of her diabetes (T2DM). Her last HbA1c taken 1 week ago was 7.6%, with other routine blood tests within normal range. Her current medications include metformin 1g twice daily, perindopril/indapamide 5/1.25mg daily and bisoprolol 5mg daily. She has been compliant with her medications and lifestyle changes. Past history also includes hypertension, congestive cardiac failure, and recurrent UTIs. She is eager to start another medication to help improve her diabetes control but doesn't want “something involving needles” or increase her risk of weight gain.

On examination, she has a BMI of 37, vitals stable and within normal limits, with peripheral neuropathy to distal shin. Cardiopulmonary examination is unremarkable.

Which of the following medications would be the most appropriate to initiate?

1. Thiazolidinedione
2. Sulfonylurea
3. Insulin
4. **Dipeptidyl peptidase-4 inhibitor**
5. Sodium-glucose cotransporter 2 inhibitor

**Post Answer Feedback**:
Option A: Thiazolidinedione (oral antidiabetic agent, but contraindicated in cardiac failure)
Option B: Sulfonylurea (oral antidiabetic agent, but associated with weight gain)
Option C: Insulin (administered through subcutaneous injection and associated with weight gain)
Option D: Dipeptidyl peptidase-4 inhibitor (correct answer oral antidiabetic agent that is weight neutral)
Option E: Sodium-glucose cotransporter 2 inhibitor (oral antidiabetic agent, but increases the risk of UTIs)

Theme: Neurology (adverse effects)

8. A 35 year old man has been admitted to the emergency department with a suspected benzodiazepine overdose, as he has presented with:

1. Nausea and vomiting, tremors and anxiety
2. **Altered conscious state, ataxia and respiratory depression**
3. Mydriasis, urinary retention and extreme thirst
4. Euphoria, conjunctival injection and perceptual alterations
5. Miosis, coma and respiratory depression

**Post Answer Feedback**:Option A: Nausea and vomiting, tremors and anxiety (benzodiazepine withdrawal)
Option B: Altered conscious state, ataxia and respiratory depression (correct answer)
Option C: Mydriasis, urinary retention and extreme thirst (atropine (anticholinergic) overdose)
Option D: Euphoria, conjunctival injection and perceptual alterations (cannabis intoxication)
Option E: Miosis, coma and respiratory depression (opioid overdose)

Theme: Psychiatry (adverse effects)

9. Through an interaction with which brain transmitter does antipsychotic agents induce extrapyramidal adverse effects?

1. Inhibition of prolactin release in the tuberohypophyseal pathway.
2. Muscarinic receptors blockade in the corpus striatum.
3. **Dopamine receptor blockade in nigrostriatal pathway.**
4. Serotonergic receptor blockade in the raphe nuclei within the brainstem.
5. Release of noradrenaline onto the nucleus accumbens of the mesolimbic pathway.

**Post Answer Feedback**: Antipsychotic agents induce extrapyramidal adverse effects through dopamine receptor blockade in nigrostriatal pathway which result in an imbalance of dopamine and acetylcholine in the corpus striatum. The reduction in dopaminergic signalling results in a relative cholinergic excess in the brain as dopaminergic inhibition of cholinergic interneurons is lost. Cholinergic hyperactivity activates muscarinic receptors, particularly those on the indirect pathway. Over-stimulation of the indirect (inhibitory) pathway contributes to involuntary movements and extrapyramidal side effects such as dystonia, akathisia, parkinsonism and tardive dyskinesia.

Other important adverse effects of antipsychotic therapy: Dopamine blockade in the tuberohypophyseal pathway is associated with hyperprolactinemia (increased prolactin release) which may result in galactorrhoea, infertility and menstrual irregularities (in women).

Theme: Haematology

10. Which of the following statements is **false** regarding the medication warfarin?

1. Warfarin is structurally similar to Vitamin K
2. Response to warfarin may be increased by Vitamin K deficiency, aging and liver disease
3. Warfarin is associated with numerous CYP450 drug interactions
4. Warfarin has a slow onset of effect and therefore may require “bridging Clexane”
5. **Regular monitoring of APTT is required**

**Post Answer Feedback**: Warfarin is a vitamin K inhibitor, which acts through suppressing vitamin K regeneration (Via suppressing VKORC1). This reduces vitamin K availability for critical post-translational modifications to liver synthesised coagulation factors (Specifically Factor II, VII, IX and X). As this drug only affects the synthesis of coagulation factors, the onset of action is slow and temporary “bridging” anticoagulation may be required. Generally, the effectiveness of warfarin therapy is monitored through INR (Based upon prothrombin time) as a measure of the inhibition of the extrinsic cascade (Rather than APTT, which measures the intrinsic coagulation cascade).

Theme: Renal (MOA)

11. Which of the following diuretic agents is potassium sparing?

1. Loop diuretic (e.g. furosemide)
2. Carbonic anhydrase inhibitor (e.g. acetazolamide)
3. **Sodium channel antagonist (e.g. amiloride)**
4. Thiazide or thiazide like diuretic (e.g. chlorothiazide or indapamide)
5. Osmotic diuretic (e.g. mannitol)

**Post Answer Feedback**:

| Potassium sparing (retain K+) | Potassium wasting (promote excretion K+) | Variable effect on Potassium |
| --- | --- | --- |
| -Aldosterone antagonists (e.g spironolactone, eplerenone)  -Sodium channel antagonist (e.g. amiloride) | -Loop diuretic (e.g. furosemide) -Thiazide or thiazide like diuretic (e.g. chlorothiazide or indapamide) -Carbonic anhydrase inhibitor (e.g. acetazolamide) | -Osmotic diuretic (e.g. mannitol) |

Theme: Analgesia and Anaesthetics

12. Which of the following is not a common side effect of opioid therapy?

1. Respiratory depression
2. Sedation
3. Pruritus
4. **Diarrhoea** (Constipation)
5. Nausea

**Post Answer Feedback**: Opioid therapy can have central side effects, including respiratory depression, sedation and nausea. Peripheral effects also include histamine release (Which can result in pruritus) and reduces GI peristalsis/promotes GI segmentation (Which can result in constipation).
